# Supplementary material for: MQuad enables clonal substructure discovery using single cell mitochondrial variants
Source: PubMed Central journal article supplement (PMC8904442; doi:10.1038/s41467-022-28845-0), 2022-03-08
Supplement: 41467_2022_28845_MOESM1_ESM.pdf [file 41467_2022_28845_MOESM1_ESM.pdf]

# Supplementary file for “MQad enables clonal substructure discovery using single cell mitochondrial variants”

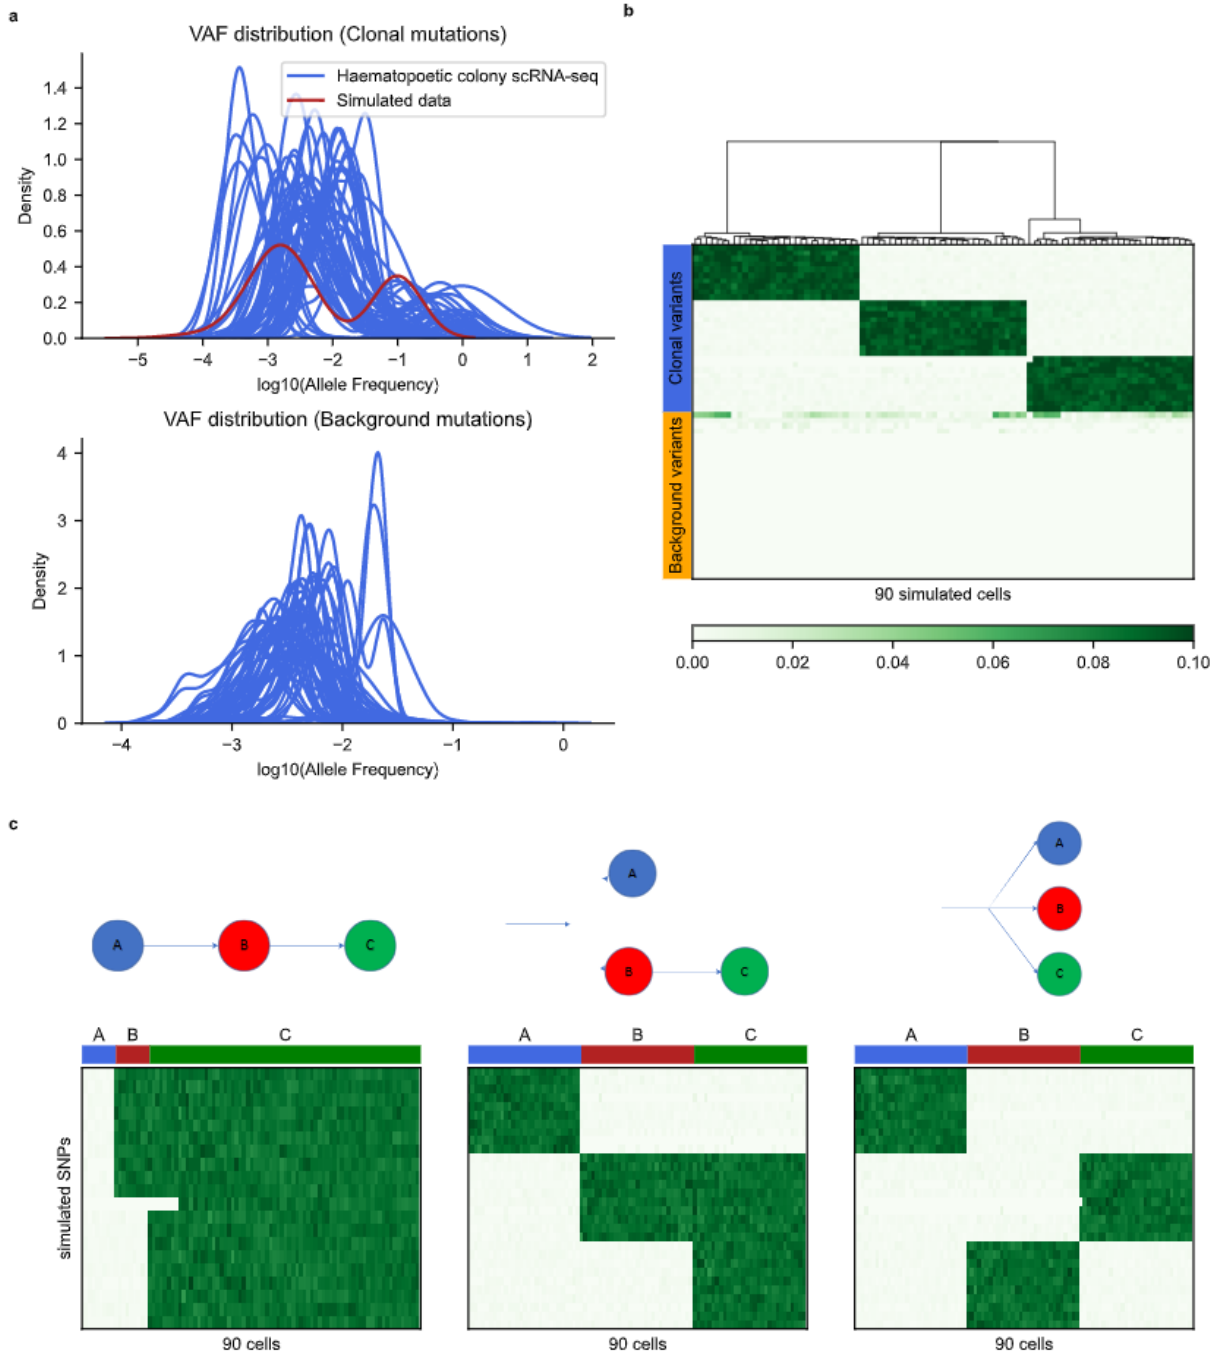

Supplementary Fig. 1: Additional data on simulation settings.

**a**, VAF distribution of clonal mutations (top) and background mutations (bottom) found in hematopoietic colony scRNA-seq dataset. Red line indicates the distribution of VAF of simulated clonal variants.

**b**, VAF heatmap with hierarchical clustering of 30 simulated clonal variants and 30 random background mutations. Rows are variants, columns are cells. Simulation settings shown here are default: 10 informative variants in each clone, 10% VAF, equal clone sizes, fully branched tree.

**c**, Tree topologies (top) and VAF heatmap of clonal variants reflecting the corresponding clonal dynamics (bottom) .

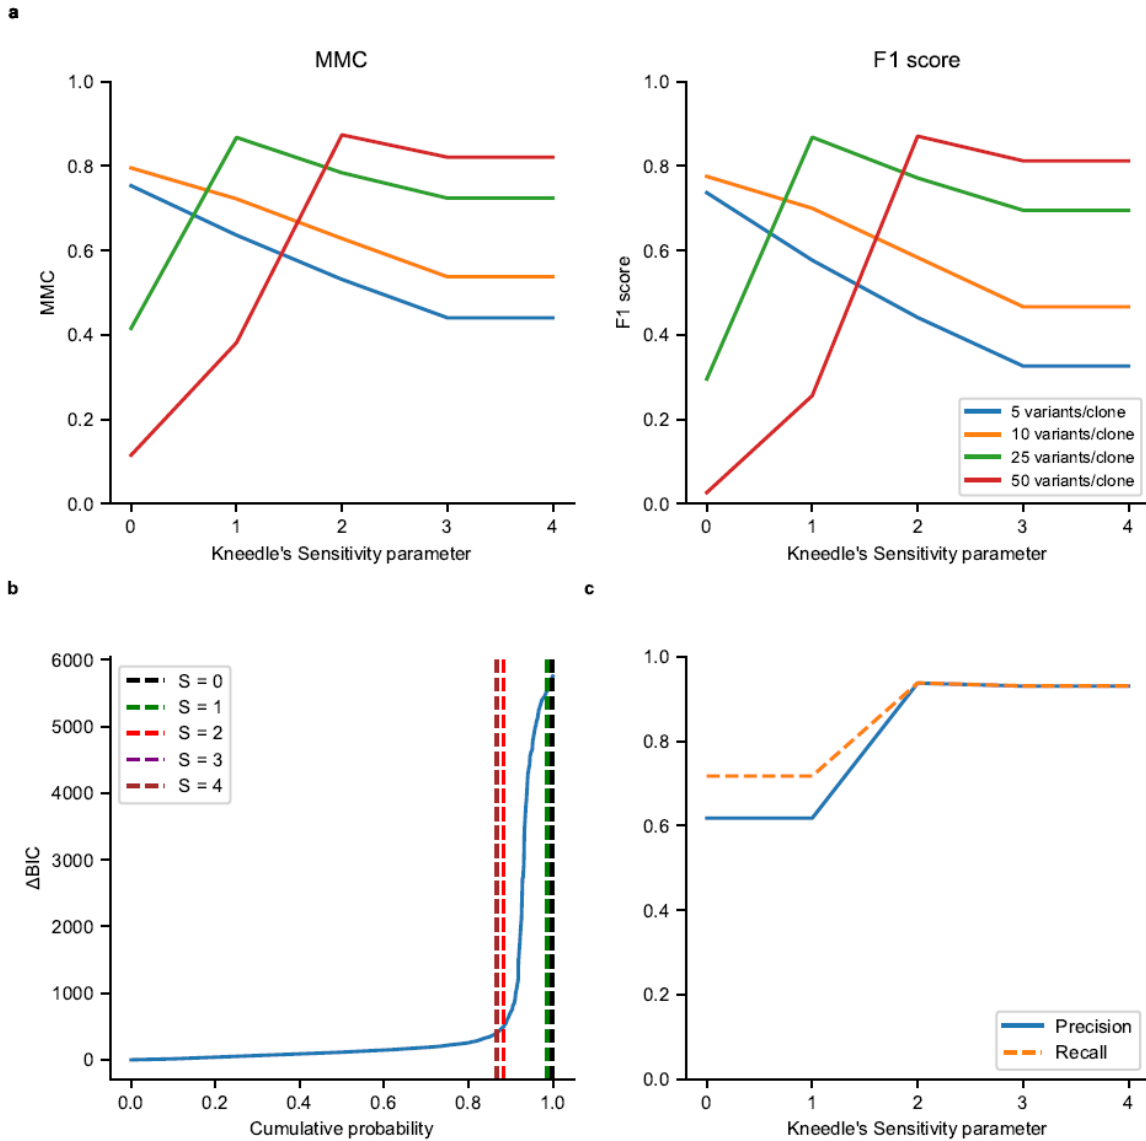

**Supplementary Fig. 2: Effect of varying the sensitivity parameter in Kneedle.**

**a**, Change in MMC (left) and F1 score (right) with regard to variant detection when varying the sensitivity parameter in Kneedle on simulated datasets.

**b**, Cumulative probability of  $\Delta BIC$  in Kim ccRCC dataset with different Kneedle cutoffs. S represents sensitivity. N.B. the line for S=3 is covered by the line for S=4.

**c**, Change in precision and recall for clonal assignment in Kim ccRCC dataset, using variants identified from varying Kneedle cutoffs.

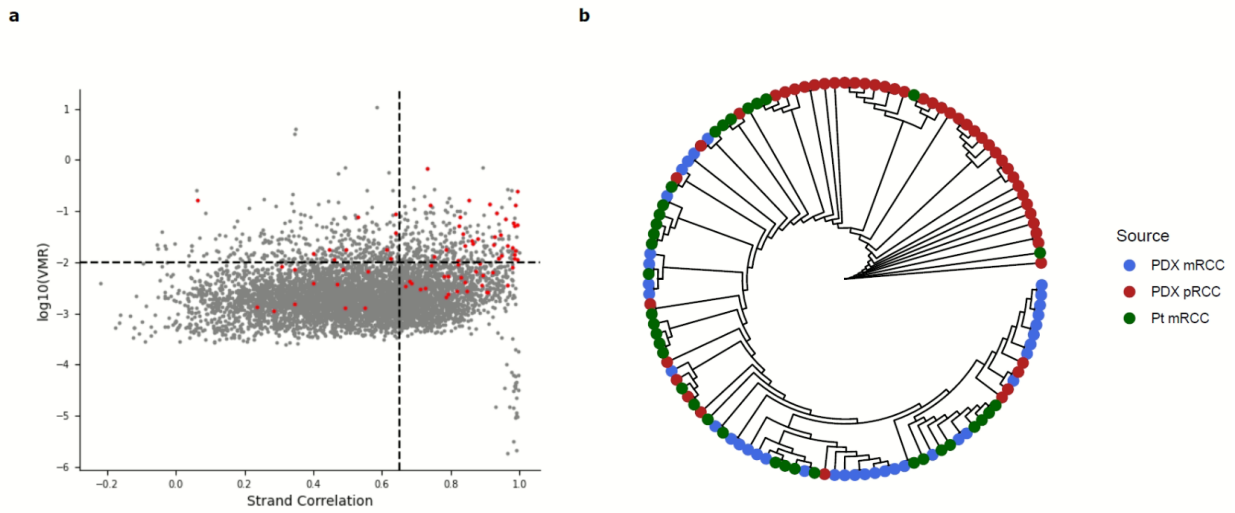

**Supplementary Fig. 3: Extended analysis on Kim ccRCC dataset.**

**a**, Output from mgatk showing  $\log(\text{VMR})$  against strand correlation. Each dot is a variant, variants detected by MQuad are highlighted in red. Dotted lines are default thresholds for informativeness determination.

**b**, Phylogenetic tree inferred by SCITE use MQuad variants as input. N.B., SCITE takes an input of presence and absence of alternative allele, hence we set a threshold  $0.9 > \text{VAF} > 0.1$  as heterozygous alternate,  $\text{VAF} \geq 0.9$  as homozygous alternate, and  $\text{VAF} \leq 0.1$  as homozygous reference.

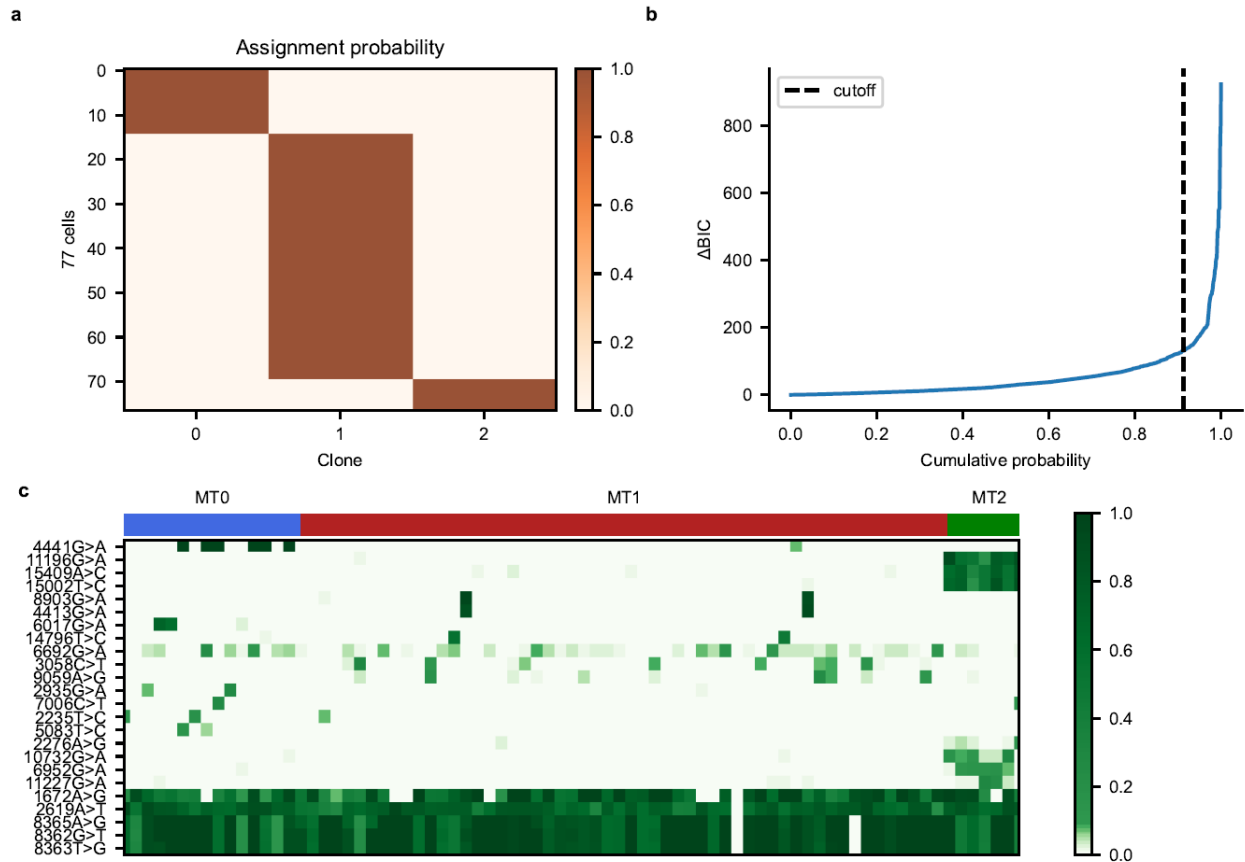

**Supplementary Fig. 4: Extended analysis on joxm fibroblast dataset.**

**a**, Clone assignment heatmap from vireoSNP. Rows are cells and columns are clones.

**b**, Cumulative probability of  $\Delta BIC$  with Kneedle cutoff shown.

**c**, Allele frequency heatmap for informative variants detected.

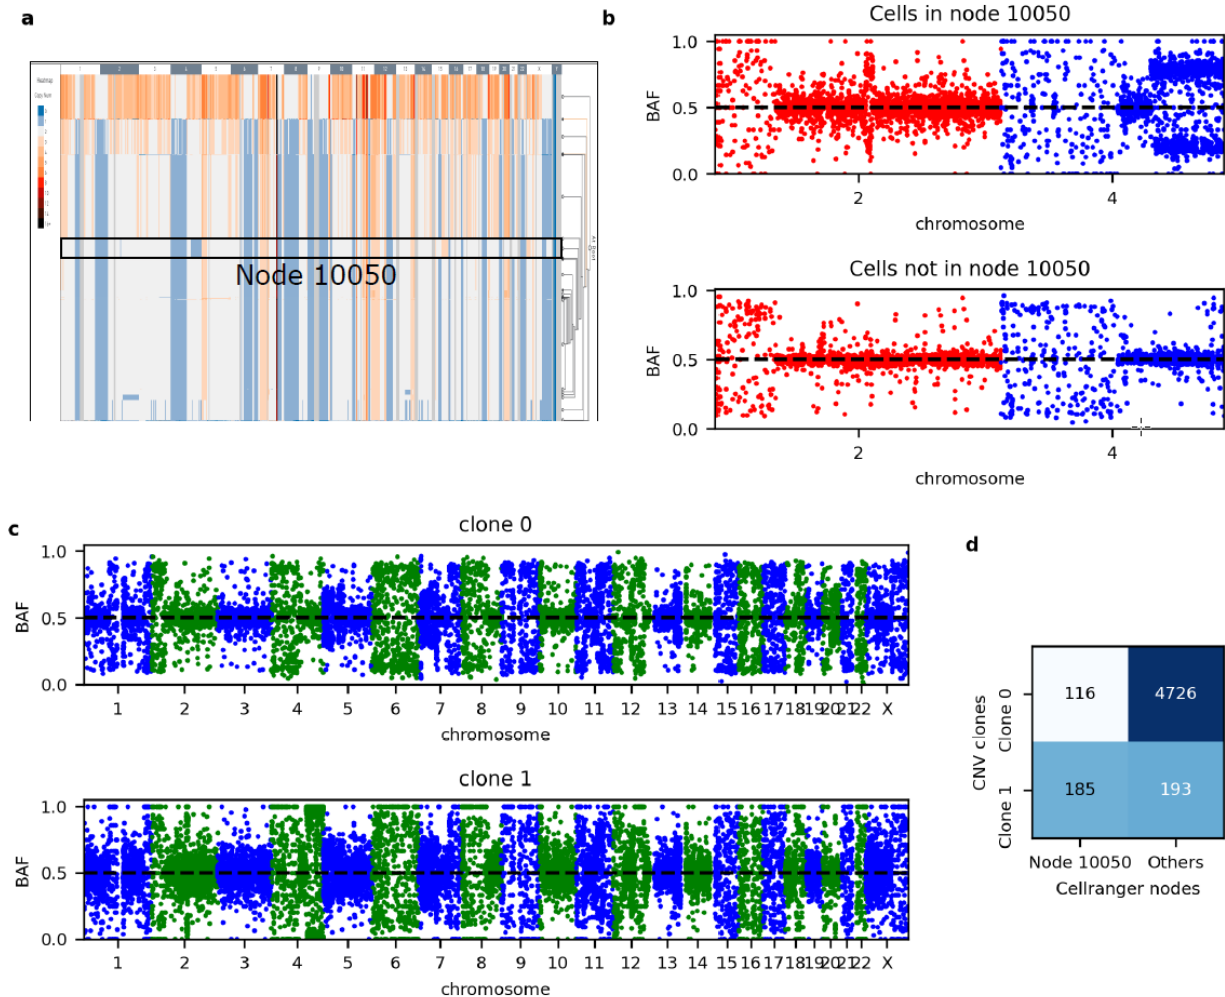

**Supplementary Fig. 5: Averaged B-allele frequency for CNV clones identified by VireoSNP binomial mixture model.**

**a**, Cellranger CNV profile of MKN-45 cell line. Node 10050 highlighted.

**b**, Averaged B-allele frequency (BAF) on chr2 and 4 for cells in node 10050 (top) and cells not in the node (bottom).

**c**, Averaged BAF on all chromosomes for CNV clone 0 (top) and clone 1 (bottom) that are identified with BAF on chr2 and chr4 (see Methods).

**d**, Confusion matrix between assigned CNV clones and original Cellranger nodes.

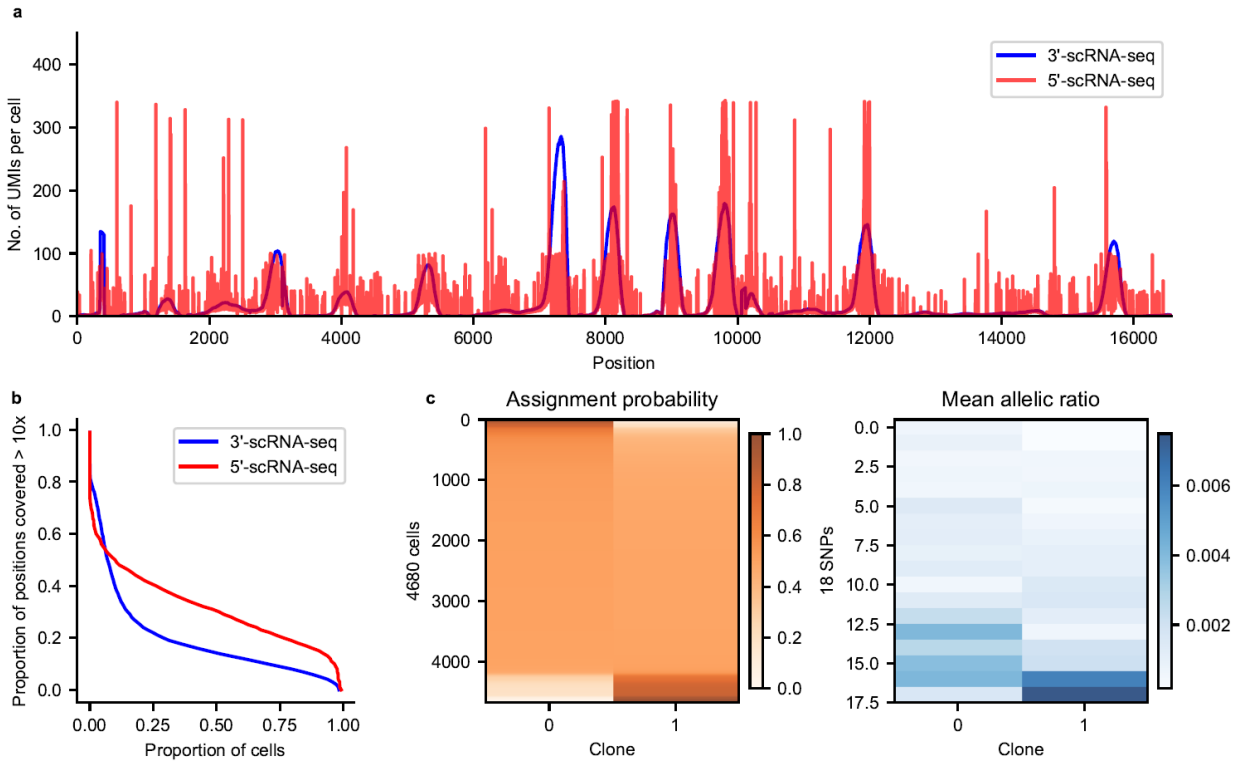

**Supplementary Fig. 6: Additional analysis on melanoma 10x 5' scRNA-seq.**

**a**, Comparison of number of UMIs per cell in 3' vs 5'-scRNA-seq

**b**, Comparison of proportion of cells with proportion of positions covered more than 10 times in 3' vs 5'-scRNA-seq.

**c**, Clone assignment heatmap for 5'-scRNA-seq dataset.

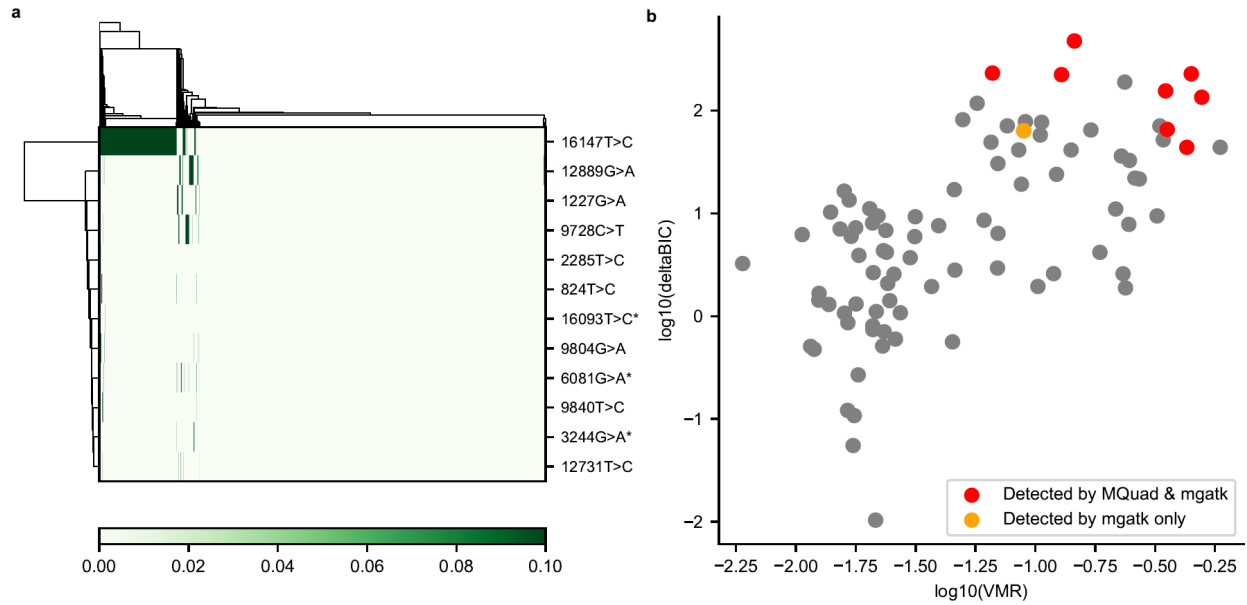

**Supplementary Fig. 7: Mitochondrial variants detected in CRC mtscATAC-seq.**

**a**, Allele frequency heatmap of variants detected by mgatk and MQuad. Asterisk denotes variants that are only detected by mgatk.

**b**, Scatter plot of variants with  $\log_{10}(\text{deltaBIC})$  against  $\log_{10}(\text{VMR})$ . Variants detected by both tools are in red. 6081G>A (orange) had a positive deltaBIC but not high enough to make the knee point. 3244G>A and 16093T>C were not detected by MQuad due to too low of a signal.



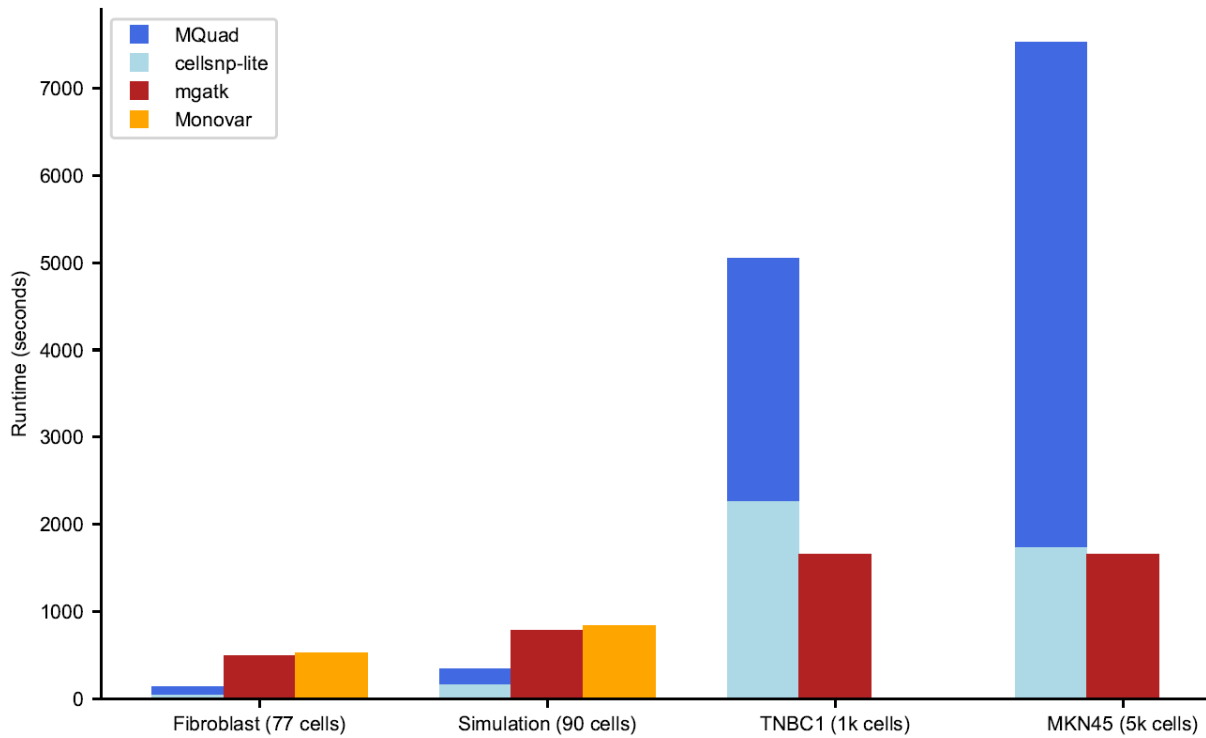

**Supplementary Fig. 8: Runtime comparison on datasets of various sizes.**

All tools are benchmarked on Intel Xeon Gold 6238R CPU with 10 threads.

N.B. Monovar cannot be run on 10x datasets as it takes a list of bam files as input and cannot demultiplex 10x bam files with barcodes.

| Sequencing platform | Dataset    | # cells | Mean MT reads   | Coverage saturation | # informative variants | Assignable proportion              | n_clones |
|---------------------|------------|---------|-----------------|---------------------|------------------------|------------------------------------|----------|
| Smart-seq2          | Kim ccRCC  | 121     | 234,294         | Good                | 146                    | 100%                               | 3        |
|                     | Fibroblast | 77      | 27,334          | Good                | 24                     | 100%                               | 3        |
| mtscATAC-seq        | CRC        | 3,559   | 28,273 (1,774*) | Moderate            | 9                      | 25% (52% for high quality cells**) | 3        |
| 10x CNV             | MKN-45     | 5,220   | 8,020           | Good                | 24                     | 93%                                | 5        |
|                     |            |         | 4,010           | Moderate            | 15                     | 88%                                | 5        |
|                     |            |         | 2,005           | Moderate            | 15                     | 81%                                | 5        |
| 10x 3' scRNA-seq    | TNBC1      | 1,097   | 36,381          | Moderate            | 2                      | 96%                                | 2        |
|                     | TNBC2      | 1,034   | 22,705          | Poor                | 3                      | 0%                                 | NA       |
|                     | TNBC5      | 3,225   | 35,337          | Poor                | 17                     | 5%                                 | 2        |
| 10x 5' seq          | Melanoma   | 4,680   | 4,420           | Poor                | 18                     | 8%                                 | 2        |

**Supplementary Table 1: Summary of all datasets used.** Mean MT reads is estimated by dividing the total number of reads in the big bam file (samtools idxstats) by the number of cell barcodes used.

\* The number of reads per cell decreases drastically after filtering low quality reads with default cellsnp-lite parameters (samtools view -q 20 -m 20 -F 1796).

\*\* The default 3,559 cells are called by CellRanger and the high-quality cell barcodes (1,505 cells) are defined from the original paper. The relatively low assignability is caused by the majority of cells having nearly no coverage on those clonal variants; if only the high quality cells are considered, the assignability is improved.

---

**Algorithm 1:** Expectation Maximization

---

**Input:** AD, DP,  $K=2$

**Output:**  $\pi_k, \theta_k, (k = 0, \dots, K - 1)$

**for each**  $k$  **do**

    Randomly Initialize  $\pi_k, \theta_k,$

*s.t.*  $\sum_k \pi_k = 1; 0 \leq \theta_k \leq 1$

**end**

**while** *Not Convergence* **do**

    # *E-step:*

**for each**  $k$  **do**

**for**  $j=1:M$  **do**

$$\bar{\gamma}_k^{(j)} := \frac{\theta_k^{AD_j} (1-\theta_k)^{(DP_j-AD_j)} \cdot \pi_k}{\sum_k \theta_k^{AD_j} (1-\theta_k)^{(DP_j-AD_j)} \cdot \pi_k}$$

**end**

**end**

    # *M-step:*

**for each**  $k$  **do**

$$\pi_k = \frac{\sum_{j=1}^M \bar{\gamma}_k^{(j)}}{N}; \theta_k = \frac{\sum_{j=1}^M AD_j \bar{\gamma}_k^{(j)}}{\sum_{j=1}^M DP_j \bar{\gamma}_k^{(j)}}$$

**end**

**end**

---

**Supplementary Algorithm 1: Expectation Maximization**
